# Supplementary material for: Systems analysis of the CO2 concentrating mechanism in cyanobacteria
Source: eLife journal article supplement (doi:10.7554/elife.02043), 2014-04-29
Supplement: supp [file elife_poa_e02043_Supplementary_File_1.pdf › elife_poa_e02043_Supplementary_File_1.pdf]

# Supplementary File 1: Analytic equations derivation

## S1 Equations in the cytosol

The equations for diffusion of  $\text{HCO}_3^-$ ,  $\text{H}$ , and  $\text{CO}_2$ ,  $\text{C}$ , in the cytosol are

$$\partial_t C = D \nabla^2 C \quad (1)$$

$$\partial_t H = D \nabla^2 H. \quad (2)$$

Here  $D$  is the diffusion coefficient.

At steady state and in spherical coordinates the solutions to  $\nabla^2 C = 0$  and  $\nabla^2 H = 0$  are known; they have the form

$$C = \frac{A_3}{r} + A_4 \quad (3)$$

$$H = \frac{B_3}{r} + B_4 \quad (4)$$

where  $A_3$ ,  $A_4$ ,  $B_3$ , and  $B_4$  are constants set by the boundary conditions.

The boundary condition at the cell membrane sets the gradient;

$$D \frac{\partial C}{\partial r} = -\frac{\alpha C_{\text{cytosol}}}{K_\alpha + C_{\text{cytosol}}} + k_m^C (C_{\text{out}} - C_{\text{cytosol}}) \quad (5)$$

$$D \frac{\partial H}{\partial r} = j_c H_{\text{out}} + \frac{\alpha C_{\text{cytosol}}}{K_\alpha + C_{\text{cytosol}}} + k_m^H (H_{\text{out}} - H_{\text{cytosol}}) \quad (6)$$

Here active transport of  $\text{HCO}_3^-$  is set by the transport velocity  $j_c$ . Conversion of  $\text{CO}_2$  to  $\text{HCO}_3^-$  has maximum velocity  $\alpha$  and half maximum concentration  $K_\alpha$ . The permeability of the cell membrane to  $\text{CO}_2$  and  $\text{HCO}_3^-$  are set by escape velocities  $k_m^C$  and  $k_m^H$ . We will assume the reactions are unsaturated, so  $\frac{\alpha C_{\text{cytosol}}}{K_\alpha + C_{\text{cytosol}}} \approx \frac{\alpha}{K_\alpha} C_{\text{cytosol}}$ .

Similarly the gradient at the carboxysome shell sets the linking boundary condition between the concentrations inside the carboxysome and in the cytosol.

$$D \frac{\partial C}{\partial r} = k_c (C_{\text{cytosol}} - C_{\text{carboxysome}}) \quad (7)$$

$$D \frac{\partial H}{\partial r} = k_c (H_{\text{cytosol}} - H_{\text{carboxysome}}). \quad (8)$$

Here the velocity of transport across the carboxysome shell is  $k_c$ .

### S1.1 Solution in cytosol

Using equation 1.3 in boundary condition 1.7 and equation 1.4 in boundary condition 1.7, we obtain:

$$A_4 = C_{\text{carboxysome}} - A_3 \left( \frac{D}{k_c R_c^2} + \frac{1}{R_C} \right) \quad (9)$$

$$B_4 = H_{\text{carboxysome}} - B_3 \left( \frac{D}{k_c R_c^2} + \frac{1}{R_C} \right) \quad (10)$$

so

$$C = A_3 \left( \frac{1}{r} - \frac{D}{k_c R_c^2} - \frac{1}{R_C} \right) + C_{carboxysome} \quad (11)$$

$$H = B_3 \left( \frac{1}{r} - \frac{D}{k_c R_c^2} - \frac{1}{R_C} \right) + H_{carboxysome} \quad (12)$$

Then using 1.11 in 1.5 and 1.12 in 1.6 we find;

$$A_3 = \frac{(\frac{\alpha}{K_\alpha} + k_m^C)C_{carboxysome} - k_m^C C_{out}}{(\frac{\alpha}{K_\alpha} + k_m^C)G + \frac{D}{R_b^2}} \quad (13)$$

$$B_3 = \frac{(k_m^H H_{carboxysome} - (j_c + k_m^H)H_{out} - \frac{\alpha}{K_\alpha} C_{cytosol}(r = R_b))}{k_m^H G + \frac{D}{R_b^2}} \quad (14)$$

We have grouped the following parameters:

$$G = \left( \frac{D}{R_c^2 k_c} + \frac{1}{R_c} - \frac{1}{R_b} \right) \quad (15)$$

Using our values for these constants we find the equations for  $\text{CO}_2$  and  $\text{HCO}_3^-$  in the cytosol;

$$C_{cytosol} = \frac{k_m^C C_{out} - (\frac{\alpha}{K_\alpha} + k_m^C)C_{carboxysome}}{(\frac{\alpha}{K_\alpha} + k_m^C)G + \frac{D}{R_b^2}} \left( \frac{D}{k_c R_c^2} + \frac{1}{R_C} - \frac{1}{r} \right) + C_{carboxysome} \quad (16)$$

$$H_{cytosol} = \frac{(j_c + k_m^H)H_{out} + \frac{\alpha}{K_\alpha} C_{cytosol}(r = R_b) - k_m^H H_{carboxysome}}{k_m^H G + \frac{D}{R_b^2}} \left( \frac{D}{k_c R_c^2} + \frac{1}{R_C} - \frac{1}{r} \right) + H_{carboxysome} \quad (17)$$

Here the concentration of  $\text{CO}_2$  at the cell membrane,

$$C_{cytosol}(r = R_b) = \frac{k_m^C C_{out} - (\frac{\alpha}{K_\alpha} + k_m^C)C_{carboxysome}}{(\frac{\alpha}{K_\alpha} + k_m^C)G + \frac{D}{R_b^2}} G + C_{carboxysome} \quad (18)$$

## S2 Equations in carboxysome

In the carboxysome the equations are

$$\partial_t C = D \nabla^2 C + R_{CA} - R_{Rub} \quad (19)$$

$$\partial_t H = D \nabla^2 H - R_{CA}, \quad (20)$$

where the equation for the carbonic anhydrase reaction is

$$R_{CA}(H, C) = \frac{V_{ba} K_{ca} H - V_{ca} K_{ba} C}{K_{ba} K_{ca} + K_{ca} H + K_{ba} C} \quad (21)$$

Here  $V_{ba}$  and  $V_{ca}$  are the maximum rates of dehydration and hydration.  $K_{ba}$  and  $K_{ca}$  are the half maximum concentration rates for dehydration and hydration.

The equation for the RuBisCO reaction is

$$R_{Rub} = \frac{V_{max}C}{C + K_m} \quad (22)$$

$$K_m = K'_m(1 + \frac{O}{K_i}) \quad (23)$$

Here  $V_{max}$  is the maximum rate of carbon fixation by RuBisCO, and  $K_m$  is half maximum concentration rate, modified to include competitive binding with  $O_2$ , O.

We can use the solution in the cytosol to write a boundary condition at the carboxysome:

$$\begin{aligned} \frac{\partial C}{\partial r} &= -\frac{A_3}{r^2} \\ &= -\left(\frac{1}{R_c^2}\right) \frac{(\frac{\alpha}{K_\alpha} + k_m^C)C_{carboxysome} - k_m^C C_{out}}{(\frac{\alpha}{K_\alpha} + k_m^C)G + \frac{D}{R_b^2}} \end{aligned} \quad (24)$$

$$\begin{aligned} \frac{\partial H}{\partial r} &= -\frac{B_3}{r^2} \\ &= -\left(\frac{1}{R_c^2}\right) \frac{k_m^H H_{carboxysome} - (j_c + k_m^H)H_{out} - \frac{\alpha}{K_\alpha} C_{cytosol}(r = R_b)}{k_m^H G + \frac{D}{R_b^2}} \end{aligned} \quad (25)$$

### S3 RuBisCO negligible in setting up $CO_2$ concentration

When RuBisCO negligible we can find the solution in the carboxysome as a balance between the carbonic anhydrase dehydration reaction and either the hydration reaction or diffusion.

#### S3.1 Carbonic anhydrase equilibrates carbon in carboxysome

If the carbonic anhydrase rate is faster than the diffusion rate then diffusion will be negligible and the solution in the carboxysome is set by  $R_{CA} \approx 0$ ;

$$H_{carboxysome} \approx \frac{V_{ca}K_{ba}}{V_{ba}K_{ca}} C_{carboxysome}. \quad (26)$$

Another consequence of looking at equations 1.19 and 1.20 at steady state with  $R_{Rub} \approx 0$  is that  $\nabla^2(C + H) \approx 0$ . Integrating once we get:

$$\begin{aligned} \frac{\partial(C + H)}{\partial r} &= \frac{a}{r^2} = 0 \\ \frac{\partial(C + H)}{\partial r}(r = R_c) &= 0 \end{aligned} \quad (27)$$

the constant  $a$  must be zero, or else we would get a divergent solution at  $r = 0$ . This is the same as mass conservation. Since the RuBisCO reaction is negligible, the total flux of inorganic carbon in and out of the carboxysome must balance. Using boundary conditions 1.24 and 1.25 in equation 1.27, we find a second equation for  $H$  and  $C$ .

$$\begin{aligned} &\frac{(\frac{\alpha}{K_\alpha} + k_m^C)C_{carboxysome} - k_m^C C_{out}}{(\frac{\alpha}{K_\alpha} + k_m^C)G + \frac{D}{R_b^2}} + \frac{k_m^H H_{carboxysome} - (j_c + k_m^H)H_{out}}{k_m^H G + \frac{D}{R_b^2}} \\ &\quad - \frac{\frac{\alpha}{K_\alpha} \frac{k_m^C C_{out} - (\frac{\alpha}{K_\alpha} + k_m^C)C_{carboxysome}}{(\frac{\alpha}{K_\alpha} + k_m^C)G + \frac{D}{R_b^2}} G + \frac{\alpha}{K_\alpha} C_{carboxysome}}{k_m^H G + \frac{D}{R_b^2}} = 0 \end{aligned} \quad (28)$$

Using equation 1.55 we can find the CO<sub>2</sub> concentration in the carboxysome:

$$C_{carboxysome} = \frac{(j_c + k_m^H)H_{out}((k_m^C + \frac{\alpha}{K_\alpha})G + \frac{D}{R_b^2}) + k_m^C C_{out}((k_m^H + \frac{\alpha}{K_\alpha})G + \frac{D}{R_b^2})}{(k_m^C + \frac{\alpha}{K_\alpha})(1 + \frac{V_{ca}K_{ba}}{V_{ba}K_{ca}})k_m^H G + k_m^C(1 + \frac{k_m^H V_{ca}K_{ba}}{k_m^C V_{ba}K_{ca}})\frac{D}{R_b^2}} \quad (29)$$

and the solution for H is set by 1.55.

### S3.2 Low carbonic anhydrase concentration

It is possible for the hydration reaction to be negligible compared to diffusion when carbonic anhydrase becomes saturated. In this case  $\nabla^2 H = \frac{V_{ba}}{D}$  and  $\nabla^2 C = -\frac{V_{ba}}{D}$ , implying

$$C = -\frac{V_{ba}}{6D_c}r^2 + A_1 \quad (30)$$

$$H = \frac{V_{ba}}{6D_c}r^2 + B_1. \quad (31)$$

applying boundary conditions 1.24 and 1.25 to these equations we find,

$$C_{carboxysome} = \frac{V_{ba}}{3D_c}R_c^3 \left( G + \frac{D}{(\frac{\alpha}{K_\alpha} + k_m^C)R_b^2} \right) + \frac{V_{ba}}{6D_c}(R_c^2 - r^2) + \frac{k_m^C}{\frac{\alpha}{K_\alpha} + k_m^C}C_{out} \quad (32)$$

$$H_{carboxysome} = \frac{V_{ba}}{6D_c}(r^2 - R_c^2) - \frac{V_{ba}}{3D_c}R_c^3 \left( G + \frac{D}{k_m^H R_b^2} \right) + \frac{(j_c + k_m^H)}{k_m^H}H_{out} \\ + \frac{\alpha}{k_m^H K_\alpha} \left( \frac{k_m^C C_{out}}{(\frac{\alpha}{K_\alpha} + k_m^C)G + \frac{D}{R_b^2}} \right) + \left( 1 - \frac{(\frac{\alpha}{K_\alpha} + k_m^C)G}{(\frac{\alpha}{K_\alpha} + k_m^C)G + \frac{D}{R_b^2}} \right) \frac{\alpha}{k_m^H K_\alpha} C_{carboxysome} \quad (33)$$

We have differentiated the diffusion constant in the carboxysome,  $D_c$  from the one in the cytosol,  $D$ . At the carboxysome shell we use the same diffusion constant as in the cytosol, since this is how we calculated the carboxysome permeability in the text.

## S4 RuBisCO significant

If RuBisCO is significant then the approximation 1.27 doesn't hold. Instead we need to loosen the condition. Instead of the flux of  $H + C$  out of the carboxysome being zero, it must be equal to the amount of CO<sub>2</sub> consumed in the carboxysome.

$$\int D \frac{\partial(C + H)}{\partial r}(r = R_c) dS_{carboxysome} = \int \frac{V_{max} C_{carboxysome}}{C_{carboxysome} + K_m} dV_{carboxysome} \quad (34)$$

$$4\pi R_c^2 D \left( -\frac{A_3}{R_c^2} - \frac{B_3}{R_c^2} \right) = \frac{4}{3}\pi R_c^3 \frac{V_{max} C_{carboxysome}}{C_{carboxysome} + K_m} \quad (35)$$

$$A_3 + B_3 = -\frac{R_c^3}{3D} \frac{V_{max} C_{carboxysome}}{C_{carboxysome} + K_m} \quad (36)$$

with  $A_3$  and  $B_3$  defined as before:

$$A_3 = \frac{(\frac{\alpha}{K_\alpha} + k_m^C)C_{carboxysome} - k_m^C C_{out}}{(\frac{\alpha}{K_\alpha} + k_m^C)G + \frac{D}{R_b^2}} \quad (37)$$

$$B_3 = \frac{(k_m^H H_{carboxysome} - (j_c + k_m^H)H_{out} - \frac{\alpha}{K_\alpha} C_{cytosol}(r = R_b))}{k_m^H G + \frac{D}{R_b^2}} \quad (38)$$

We still use the fact that the carboxysome is small, and so diffusion equilibrates the concentration across the carboxysome very quickly. The equation for  $\text{HCO}_3^-$  therefore, still enforces the ratio  $H_{\text{carboxysome}} \approx \frac{V_{ca}K_{ba}}{V_{ba}K_{ca}} C_{\text{carboxysome}}$ .

If we define the following:

$$N = (j_c + k_m^H)H_{out}((k_m^C + \frac{\alpha}{K_\alpha})G + \frac{D}{R_b^2}) + k_m^C C_{out}((k_m^H + \frac{\alpha}{K_\alpha})G + \frac{D}{R_b^2}) \quad (39)$$

$$M = (k_m^C + \frac{\alpha}{K_\alpha})(1 + \frac{V_{ca}K_{ba}}{V_{ba}K_{ca}})k_m^H G + k_m^C(1 + \frac{k_m^H}{k_m^C} \frac{V_{ca}K_{ba}}{V_{ba}K_{ca}}) \frac{D}{R_b^2} \quad (40)$$

$$P = ((\frac{\alpha}{K_\alpha} + k_m^C)G + \frac{D}{R_b^2})(k_m^H G + \frac{D}{R_b^2}) \quad (41)$$

then we can rewrite equation 1.36

$$N - MC_{\text{carboxysome}} - \frac{R_c^3 V_{max} C_{\text{carboxysome}}}{3D(C_{\text{carboxysome}} + K_m)} P = 0 \quad (42)$$

$$C_{\text{carboxysome}}^2 + (K_m - \frac{N}{M} + \frac{R_c^3 V_{max} P}{3DM}) C_{\text{carboxysome}} - K_m \frac{N}{M} = 0 \quad (43)$$

$$C_{\text{carboxysome}} = \frac{1}{2}(\frac{N}{M} - \frac{R_c^3 V_{max} P}{3DM} - K_m) \pm \frac{1}{2}\sqrt{(\frac{N}{M} - \frac{R_c^3 V_{max} P}{3DM} - K_m)^2 + 4\frac{N}{M}K_m} \quad (44)$$

For comparison, when RuBisCO is not significant the solution, equation 1.29, can be written as

$$C_{\text{carboxysome}} = \frac{N}{M}. \quad (45)$$

When RuBisCO is significant but saturated, and the reaction is constant, we can make the approximation:

$$C_{\text{carboxysome}} = \frac{N}{M} - \frac{R_c^3 V_{max} P}{3MD}. \quad (46)$$

When RuBisCO is significant but unsaturated, and the reaction is linear in  $\text{CO}_2$  concentration, we can make the approximation:

$$C_{\text{carboxysome}} = \frac{N}{M + \frac{R_c^3 V_{max} P}{3K_m D}}. \quad (47)$$

## S5 Reactions everywhere in cell

When RuBisCO and carbonic anhydrase are everywhere in the cell the equations previously used in the carboxysome apply everywhere:

$$\partial_t C = D\nabla^2 C + R_{CA} - R_{Rub} \quad (48)$$

$$\partial_t H = D\nabla^2 H - R_{CA}, \quad (49)$$

$$R_{CA}(H, C) = \frac{V_{ba}K_{ca}H - V_{ca}K_{ba}C}{K_{ba}K_{ca} + K_{ca}H + K_{ba}C} \quad (50)$$

$$R_{Rub} = \frac{V_{max}C}{C + K_m} \quad (51)$$

but now the only boundary condition is at the cell membrane;

$$D \frac{\partial C}{\partial r} = -\frac{\alpha C_{cytosol}}{K_\alpha + C_{cytosol}} + k_m^C (C_{out} - C_{cytosol}) \quad (52)$$

$$D \frac{\partial H}{\partial r} = j_c H_{out} + \frac{\alpha C_{cytosol}}{K_\alpha + C_{cytosol}} + k_m^H (H_{out} - H_{cytosol}) \quad (53)$$

Equations 1.48 and 1.49 can now be solved making the same approximations as before.

### S5.1 Carbonic anhydrase equilibrates carbon in cell

Using the analogous approximation to equation 1.27, set by boundary conditions 1.53 and 1.53,

$$\frac{\partial(C + H)}{\partial r}(r = R_b) = 0 \quad (54)$$

and

$$H_{cytosol} \approx \frac{V_{ca} K_{ba}}{V_{ba} K_{ca}} C_{cytosol}. \quad (55)$$

we find

$$\begin{aligned} & -\frac{\alpha C_{cytosol}}{K_\alpha + C_{cytosol}} + k_m^C (C_{out} - C_{cytosol}) \\ & + j_c H_{out} + \frac{\alpha C_{cytosol}}{K_\alpha + C_{cytosol}} + k_m^H \left( H_{out} - \frac{V_{ca} K_{ba}}{V_{ba} K_{ca}} C_{cytosol} \right) = 0 \end{aligned} \quad (56)$$

$$C_{cytosol} = \frac{k_m^C C_{out} + (j_c + k_m^H) H_{out}}{k_m^C \left( 1 + \frac{k_m^H}{k_m^C} \frac{V_{ca} K_{ba}}{V_{ba} K_{ca}} \right)} \quad (57)$$

### S5.2 Low carbonic anhydrase concentration

When carbonic anhydrase concentration is low and saturated we have the same equations as before,

$$C = -\frac{V_{ba}}{6D} r^2 + A_1 \quad (58)$$

$$H = \frac{V_{ba}}{6D} r^2 + B_1. \quad (59)$$

and apply boundary conditions 1.52 and 1.53. We get:

$$C_{cytosol} = \frac{k_m^C C_{out}}{\frac{\alpha}{K_\alpha} + k_m^C} + V_{ba} \left( \frac{R_b}{3(\frac{\alpha}{K_\alpha} + k_m^C)} + \frac{R_b^2}{6D} - \frac{r^2}{6D} \right) \quad (60)$$

$$H_{cytosol} = V_{ba} \left( \frac{r^2}{6D} - \frac{R_b^2}{6D} - \frac{R_b}{3k_m^H} \right) + \frac{j_c + k_m^H}{k_m^H} H_{out} + \frac{\alpha}{K_\alpha k_m^H} C_{cytosol}(r = R_b) \quad (61)$$

### S5.3 RuBisCO significant

Following the same methodology as in section S3, we write

$$\int D \frac{\partial(C+H)}{\partial r} \Big|_{r=R_b} dS_{cell} = \int \frac{V_{max}C}{C+K_m} dV_{cell} \quad (62)$$

$$4\pi R_b^2 D \left( \frac{\partial C}{\partial r} \Big|_{r=R_b} + \frac{\partial H}{\partial r} \Big|_{r=R_b} \right) = \frac{4}{3} \pi R_b^3 \frac{V_{max}C}{C+K_m} \quad (63)$$

$$D \frac{\partial C}{\partial r} \Big|_{r=R_b} + D \frac{\partial H}{\partial r} \Big|_{r=R_b} = \frac{R_b}{3} \frac{V_{max}C}{C+K_m} \quad (64)$$

Where the two partial derivatives at  $r = R_b$  are defined by boundary conditions 1.52 and 1.53. We can define

$$N_2 = k_m^C C_{out} + (j_c + k_m^H) H_{out} \quad (65)$$

$$M_2 = k_m^C \left( 1 + \frac{k_m^H V_{ca} K_{ba}}{k_m^C V_{ba} K_{ca}} \right) \quad (66)$$

Note that  $N_2$  and  $M_2$  do not have the same dimensions as  $N$  and  $M$  defined previously. Using these definitions we can solve for the CO<sub>2</sub> concentration in the cytosol.

$$N_2 - M_2 C - \frac{R_b}{3} \frac{V_{max}C}{C+K_m} = 0 \quad (67)$$

$$C_{cytosol}^2 + \left( K_m - \frac{N_2}{M_2} + \frac{R_b V_{max}}{3M_2} \right) C_{cytosol} - K_m \frac{N_2}{M_2} = 0 \quad (68)$$

$$C_{cytosol} = \frac{1}{2} \left( \frac{N_2}{M_2} - \frac{R_b V_{max}}{3M_2} - K_m \right) + \frac{1}{2} \sqrt{\left( K_m - \frac{N_2}{M_2} + \frac{R_b V_{max}}{3M_2} \right)^2 + \frac{4K_m N_2}{M_2}} \quad (69)$$

The equation for CO<sub>2</sub> concentration assuming negligible RuBisCO activity, equation 1.57, can be rewritten:

$$C_{cytosol} = \frac{N_2}{M_2} \quad (70)$$

If RuBisCO is saturated then the concentration is described by:

$$C = \frac{N_2}{M_2} - \frac{R_b}{3} V_{max} \quad (71)$$

If RuBisCo is unsaturated:

$$C = \frac{N_2}{M_2 + \frac{R_b V_{max}}{3K_m}} \quad (72)$$

## S6 Reactions localized without carboxysome

We assume the region where the enzymes are located remains the same size. This could be accomplished by attaching the enzymes to a scaffold instead of encapsulating them.

When there is no carboxysome shell, the boundary condition at  $R_c$  changes to:

$$C_{cytosol} = C_{scaffold} \quad (73)$$

$$H_{cytosol} = H_{scaffold} \quad (74)$$

where the concentration in the cytosol is the same as before.

$$C_{cyto} = \frac{A_3}{r} + A_4 = A_3 \left( \frac{1}{r} - \frac{1}{R_c} \right) + C_{scaffold} \quad (75)$$

$$H_{cyto} = \frac{B_3}{r} + B_4 = B_3 \left( \frac{1}{r} - \frac{1}{R_c} \right) + H_{scaffold} \quad (76)$$

Plugging equations 1.75 and 1.76 into the following boundary conditions at the cell membrane.

$$D \frac{\partial C}{\partial r} = -\frac{\alpha C_{cytosol}}{K_\alpha + C_{cytosol}} + k_m^C (C_{out} - C_{cytosol}) \quad (77)$$

$$D \frac{\partial H}{\partial r} = j_c H_{out} + \frac{\alpha C_{cytosol}}{K_\alpha + C_{cytosol}} + k_m^H (H_{out} - H_{cytosol}) \quad (78)$$

we find the values of  $A_3$  and  $B_3$  are the same as before, but with a different definition of  $G$ .

$$A_3 = \frac{(\frac{\alpha}{K_\alpha} + k_m^C) C_{scaffold} - k_m^C C_{out}}{(\frac{\alpha}{K_\alpha} + k_m^C) G + \frac{D}{R_b^2}} \quad (79)$$

$$B_3 = \frac{(k_m^H H_{scaffold} - (j_c + k_m^H) H_{out} - \frac{\alpha}{K_\alpha} C_{cytosol}(r = R_b))}{k_m^H G + \frac{D}{R_b^2}} \quad (80)$$

$$G = \left( \frac{1}{R_c} - \frac{1}{R_b} \right) \quad (81)$$

$$C_{cytosol} = \frac{k_m^C C_{out} - (\frac{\alpha}{K_\alpha} + k_m^C) C_{scaffold}}{(\frac{\alpha}{K_\alpha} + k_m^C) G + \frac{D}{R_b^2}} \left( \frac{1}{R_c} - \frac{1}{r} \right) + C_{scaffold} \quad (82)$$

$$H_{cytosol} = \frac{(j_c + k_m^H) H_{out} + \frac{\alpha}{K_\alpha} C_{cytosol}(r = R_b) - k_m^H H_{scaffold}}{k_m^H G + \frac{D}{R_b^2}} \left( \frac{1}{R_c} - \frac{1}{r} \right) + H_{scaffold} \quad (83)$$

Here the concentration of  $CO_2$  at the cell membrane,

$$C_{cytosol}(r = R_b) = \frac{k_m^C C_{out} - (\frac{\alpha}{K_\alpha} + k_m^C) C_{scaffold}}{(\frac{\alpha}{K_\alpha} + k_m^C) G + \frac{D}{R_b^2}} G + C_{scaffold} \quad (84)$$

The solution in the carboxysome is exactly what we have calculated before, in either the carbonic anhydrase equilibrating or saturated case, except with our new definition of  $G$ .
